# Supplementary material
Source: PubMed Central journal article supplement (PMC4764467)
Supplement: NIHMS752575-supplement.pdf [file NIHMS752575-supplement.pdf]

**Antenatal Hypoxia Induces Epigenetic Repression of Glucocorticoid Receptor and Promotes Ischemic-Sensitive Phenotype in the Developing Heart**

By

Fuxia Xiong<sup>1,2</sup>, Thant Lin<sup>3</sup>, Minwoo Song<sup>2</sup>, Qingyi Ma<sup>2</sup>, Shannalee R. Martinez<sup>2</sup>, Juanxiu Lv<sup>1,2</sup>,  
Eugenia MataGreenwood<sup>2</sup>, Daliao Xiao<sup>2</sup>, Zhice Xu<sup>1,2</sup> and Lubo Zhang<sup>1,2\*</sup>

<sup>1</sup>Institute for Fetology and Reproductive Medicine Center, First Hospital of Soochow University, Suzhou, China; <sup>2</sup>Center for Perinatal Biology, Department of Basic Sciences, Loma Linda University School of Medicine, Loma Linda, California USA; <sup>3</sup>Department of Pediatrics, Loma Linda University School of Medicine, Loma Linda, California USA

Short title: Glucocorticoid receptor and heart development.

**\*Author for correspondence:**

Lubo Zhang, Ph.D.  
Center for Perinatal Biology  
Division of Pharmacology  
Department of Basic Sciences  
Loma Linda University  
School of Medicine  
Loma Linda, CA 92350  
Tel: 909-558-4325  
Fax: 909-558-4029  
Email: [lzhang@llu.edu](mailto:lzhang@llu.edu)

**Supplementary Table I. Primer sequences.**

|                                   | Forward                                                                           | Reverse                                                                           |
|-----------------------------------|-----------------------------------------------------------------------------------|-----------------------------------------------------------------------------------|
| exon 1 <sub>4</sub>               | AAGCAACACCGTAACACCTT                                                              | AGAAGCAGCAGCCACTGA                                                                |
| exon 1 <sub>5</sub>               | CATGCAACTTCCTCCGAGT                                                               |                                                                                   |
| exon 1 <sub>7</sub>               | GGAGCCTGGGAGAAGAGAAA                                                              |                                                                                   |
| exon 1 <sub>11</sub>              | GCCGCAGAGAACTCAACAG                                                               |                                                                                   |
| exon 1 <sub>10</sub>              | CACGCCGACTTGTATTATC                                                               | TCTGCTGCTTGAATCTG                                                                 |
| exon 1 <sub>6</sub>               | ACCTGG CGG CAC GCG AGT                                                            | GCAGCCACTGAGGGCGAAGA                                                              |
| exon 1 <sub>8</sub>               | GACAGTCGCCAACAGGTAA                                                               | TGAGAAGCAGCAGCCACT                                                                |
| exon 1 <sub>9</sub>               | GTCAGTGCCTGGAGCCCGAG                                                              | AGCAGCCACTGAGGGCGAAG                                                              |
| GR total                          | AGGTCTGAAGAGCCAAGAGTTA                                                            | TGGAAGCAGTAGGTAAGGAGAT                                                            |
| β-Actin                           | TCAGGTCATCACTATCGGCAAT                                                            | ACTGTGTTGGCATAGAGGTCTT                                                            |
| GR-IP-1 <sub>4</sub>              | AAAGAACGACTCGGGTTTGA                                                              | CTCTGCCTGACCTCTTGGAG                                                              |
| GR-IP-1 <sub>5</sub>              | ACAGCTGGACGGAGCTAAAA                                                              | CCCGAATCTTGACATTTGCT                                                              |
| GR-IP-1 <sub>6</sub>              | GGGTTCTGCTTTGCAACTTC                                                              | GAGAGGGTCAGCGCATAACAT                                                             |
| GR-IP-1 <sub>7</sub>              | GACACACTTCGCGCAACTC                                                               | CACCCAAGGAACGAGAAAAA                                                              |
| EMSA<br>1 <sub>4</sub> -CRE<br>UM | CGACTCGGGTTTGACGCCAAAGAGCAC                                                       | GTGCTCTTTGGCGTCAAACCCGAGTCG                                                       |
| EMSA<br>1 <sub>4</sub> -CRE<br>M  | CGACTCGGGTTTGA <sub>m</sub> CGCCAAAGAGCAC                                         | GTGCTCTTTGG <sub>m</sub> CGTCAAACCCGAGTCG                                         |
| EMSA<br>1 <sub>5</sub> -CRE<br>UM | GAGCTAAAAGCTGACGTTTTAAAGATG                                                       | CATCTTTAAAACGTCAGCTTTTAGCTC                                                       |
| EMSA<br>1 <sub>5</sub> -CRE<br>M  | GAGCTAAAAGCTGA <sub>m</sub> CGTTTTAAAGATG                                         | CATCTTTAAAA <sub>m</sub> CGTCAGCTTTTAGCTC                                         |
| EMSA<br>1 <sub>6</sub> -Sp1<br>UM | GATCGGGGCGCGGGGAGGGTGGGT                                                          | ACCCACCCTCCCCGCGCCCCGATC                                                          |
| EMSA<br>1 <sub>6</sub> -Sp1<br>M  | GAT <sub>m</sub> CGGGG <sub>m</sub> CG <sub>m</sub> CGGGGAGGGTGGGT                | ACCCACCCTCCCC <sub>m</sub> CG <sub>m</sub> CGCCC <sub>m</sub> CGATC               |
| EMSA<br>1 <sub>7</sub> -Sp1<br>UM | ACCCACGGGGCGGGCTCCCGAGCGG                                                         | CCGCTCGGGAGCCCCGCCCCGTGGGT                                                        |
| EMSA<br>1 <sub>7</sub> -Sp1<br>M  | ACCCA <sub>m</sub> CGGGG <sub>m</sub> CGGGCTCC <sub>m</sub> CGAG <sub>m</sub> CGG | C <sub>m</sub> CGCT <sub>m</sub> CGGGAGCC <sub>m</sub> CGCCC <sub>m</sub> CGTGGGT |

**Supplementary Table II. Pre-ischemic baseline values of left ventricle functional parameters**

| <b>Animal groups</b>    | <b>HR (beat/min)</b> | <b>LVDP (mmHg)</b> | <b>dP/dt<sub>max</sub> (mmHg/s)</b> | <b>dP/dt<sub>min</sub> (mmHg/s)</b> | <b>CF (ml/min/g)</b> |
|-------------------------|----------------------|--------------------|-------------------------------------|-------------------------------------|----------------------|
| N <sub>-Aza</sub> (n=8) | 317±9.5              | 126.7±5.1          | 4468±116                            | 2692±86                             | 10.5±0.9             |
| H <sub>-Aza</sub> (n=9) | 320±13.5             | 125.4±8.8          | 4432±150                            | 2573±66                             | 9.6±0.7              |
| N <sub>+Aza</sub> (n=8) | 298±11.0             | 133.2±1.9          | 4543±183                            | 2681±79                             | 8.8±0.6              |
| H <sub>+Aza</sub> (n=8) | 295±17.6             | 130.6±4.1          | 4698±111                            | 2549±58                             | 8.3±0.7              |

Pregnant rats were exposed to normoxia (N) or hypoxia (H) at 10.5% O<sub>2</sub> from day 15 to day 21 of gestation. Newborn rats were injected with saline (-AZA) or 5-aza-2'-deoxycytidine (+AZA) (1 µg/g/day, *i.p.*) at postnatal day 1 and day 3. Hearts were isolated from 4 week old offspring and subjected to 45 minutes of ischemia and 30 minutes of reperfusion in a Langendorff preparation. HR, heart rate; LVDP, left ventricular developed pressure; dP/dt<sub>max</sub>, maximal rate of contraction; dP/dt<sub>min</sub>, maximal rate of relaxation; CF, coronary flow.

# Supplementary Figure I

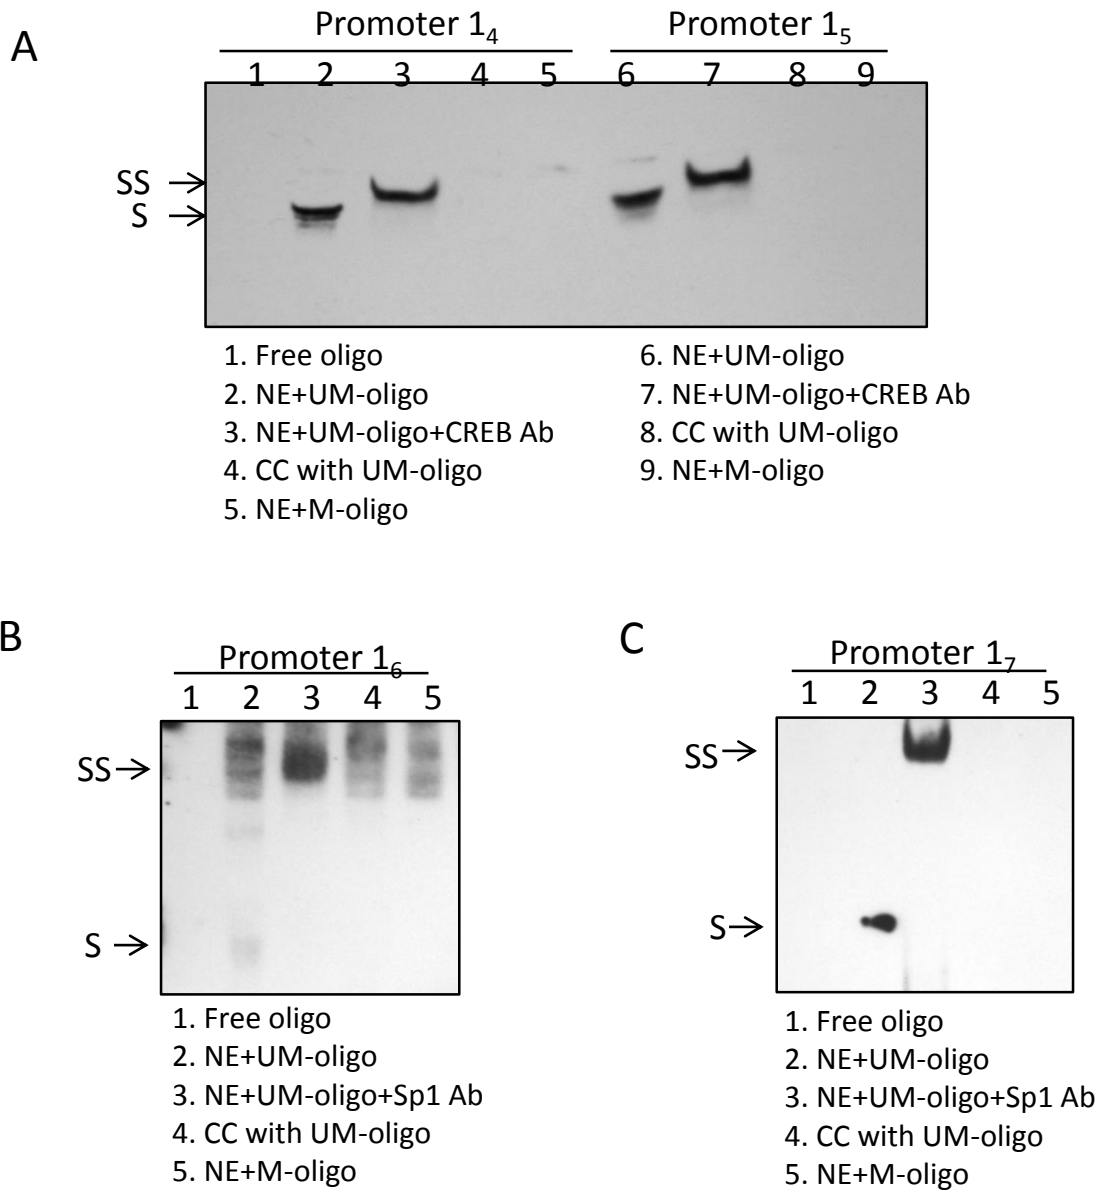

**Supplementary Figure I. Effects of methylation on binding of CREB and Sp1 to GR promoter.** Nuclear extracts (NE) from fetal hearts were incubated with double-stranded oligonucleotide probes containing unmethylated (UM) or methylated (M) CRE at GR promoter 1<sub>4</sub> and 1<sub>5</sub> (**A**), or Sp1 binding site at GR promoter 1<sub>6</sub> (**B**) and 1<sub>7</sub> (**C**) in the absence or presence of antibodies (Ab) against CREB or Sp1. Cold competition (CC) was performed with unlabeled competitor oligonucleotide at a 100-fold molar excess. Free oligo: no nuclear extracts were added. S, shift; SS, super-shift.

## Supplementary Figure II

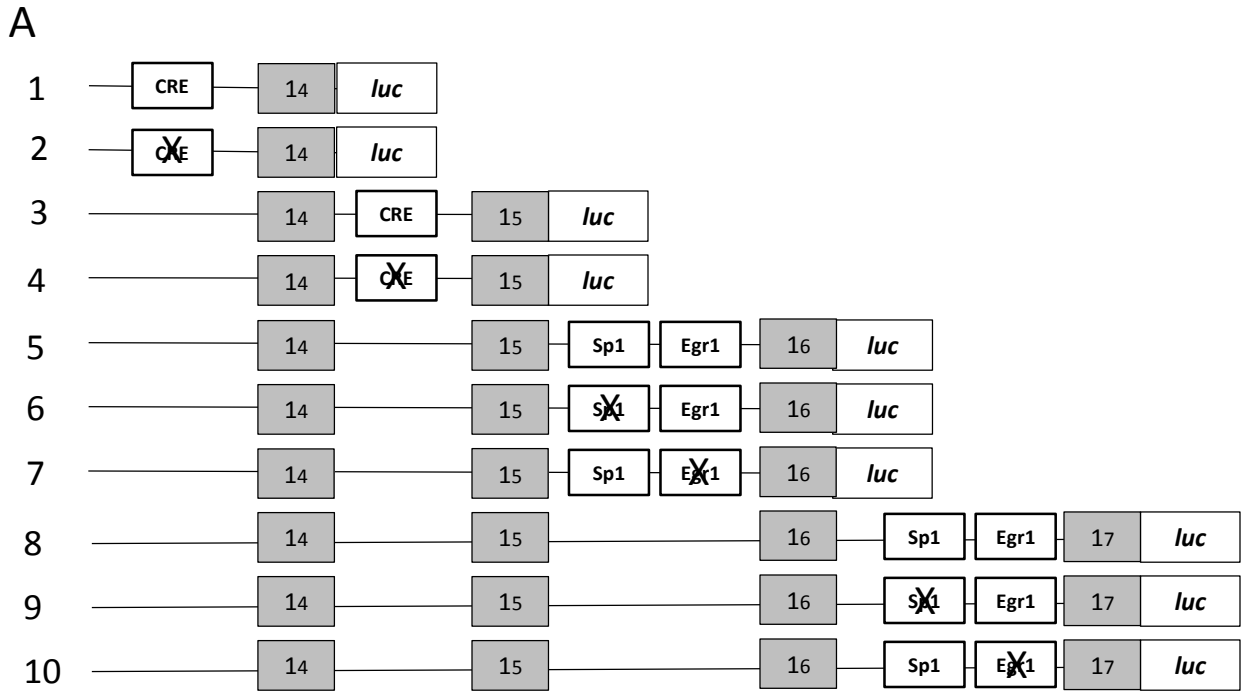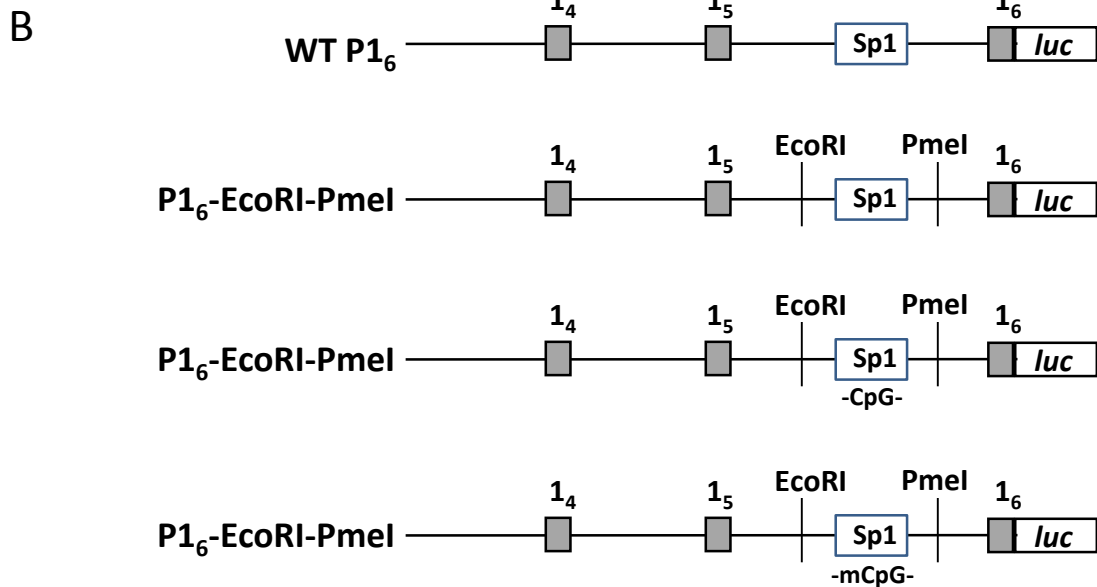

### Supplementary Figure II. Diagrammatic representation of GR promoter constructs.

Panel A shows site-directed deletion of CRE<sub>-4408</sub>, CRE<sub>-3896</sub>, Sp1<sub>-3425</sub>, Egr-1<sub>-3361</sub>, Sp1<sub>-3034</sub> and Egr-1<sub>-2996</sub> in GR promoter 1<sub>4</sub>, 1<sub>5</sub>, 1<sub>6</sub> and 1<sub>7</sub> constructs. Panel B shows wild type GR promoter 1<sub>6</sub> reporter construct (WT-P1<sub>6</sub>) and constructs with a dual insertion of EcoR1 and PmeI site (P1<sub>6</sub>-EcoRI-PmeI), an insertion of CpG methylation at Sp1 (Sp1-mCpG), and unmethylation at Sp1 (Sp1-CpG).

## Supplementary Figure III

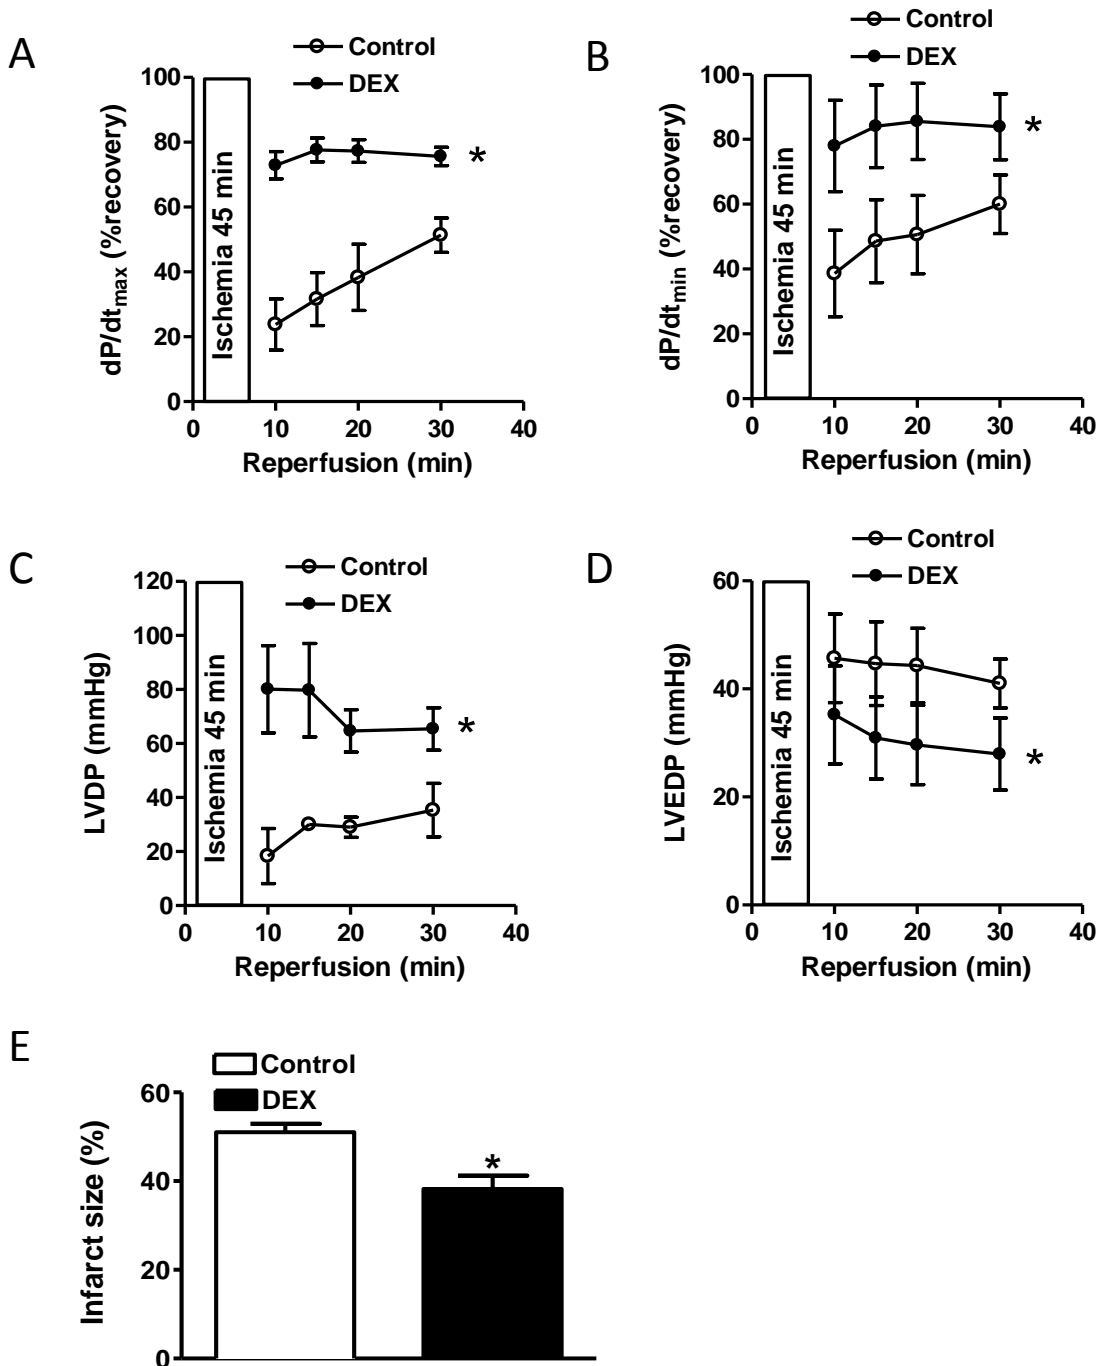

**Supplementary Figure III. Dexamethasone protected the heart from ischemia and reperfusion injury in 4 week old rats.** Four week old rats were injected with either saline (control) or dexamethasone (DEX, 1 mg/kg/day, *i.p.*) 24 hours prior to the heart isolation. Hearts were subjected to 45 minutes of ischemia and 30 minutes of reperfusion in a Langendorff preparation. LVDP, left ventricle developed pressure; LVEDP, left ventricle end-diastolic pressure. Data are mean  $\pm$  SEM,  $n = 5$ . \*  $P < 0.05$ , DEX vs. control.
